# Supplementary material for: Defect-engineered Zr-MOFs with enhanced O2 adsorption and activation for photocatalytic H2O2 synthesis
Source: Royal Society of Chemistry journal article supplement (doi:10.1039/d3cy01396k), 2023-11-27
Supplement: d3cy01396k1.pdf [file d3cy01396k1.pdf]

## Supporting information

# Defect-engineered Zr-MOFs with enhanced O<sub>2</sub> adsorption and activation for photocatalytic H<sub>2</sub>O<sub>2</sub> synthesis

*Yong Tang, Jianhao Qiu\*, Dingliang Dai, Guanglu Xia, Lu Zhang and Jianfeng Yao\**

Jiangsu Co-Innovation Center of Efficient Processing and Utilization of Forest Resources,  
College of Chemical Engineering, Nanjing Forestry University, Nanjing 210037, China

\*Corresponding author.

E-mail: [jhq@njfu.edu.cn](mailto:jhq@njfu.edu.cn) (JQ); [jfyao@njfu.edu.cn](mailto:jfyao@njfu.edu.cn) (JY)

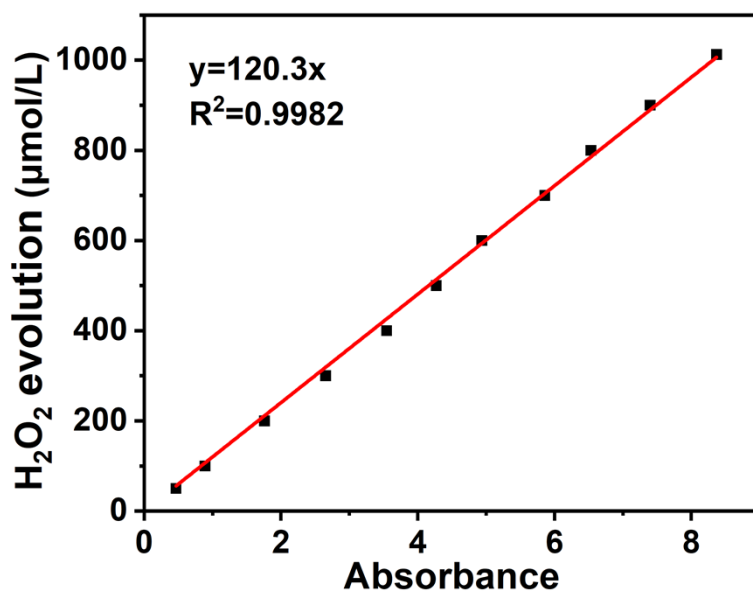

Fig. S1 The standard curve of H<sub>2</sub>O<sub>2</sub> concentration based on the iodometry.

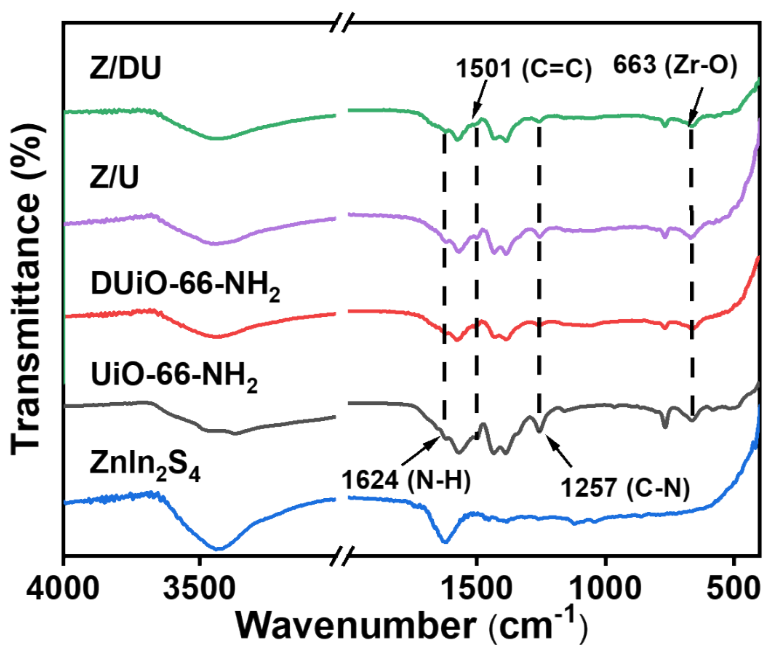

Fig. S2 FTIR spectra of UiO-66-NH<sub>2</sub>, DUiO-66-NH<sub>2</sub>, ZnIn<sub>2</sub>S<sub>4</sub>, Z/U and Z/DU.

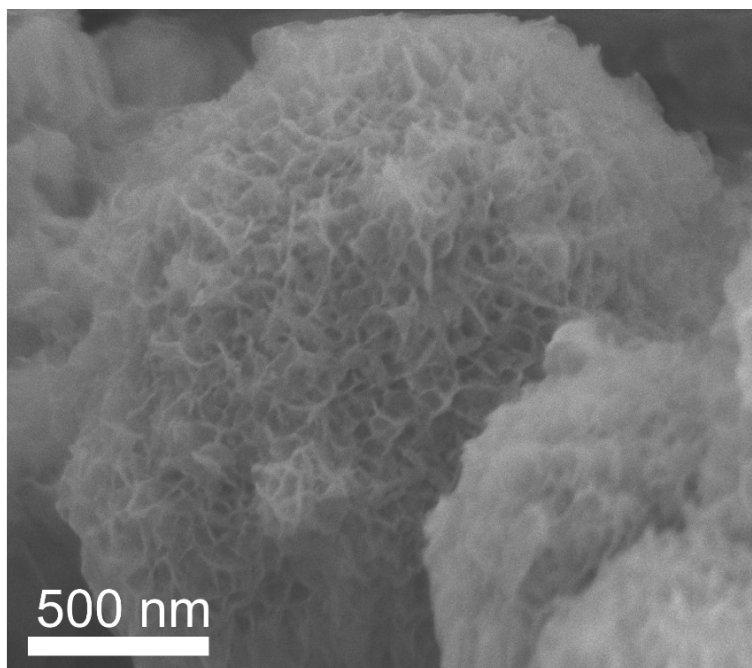

**Fig. S3** SEM image of ZnIn<sub>2</sub>S<sub>4</sub>.

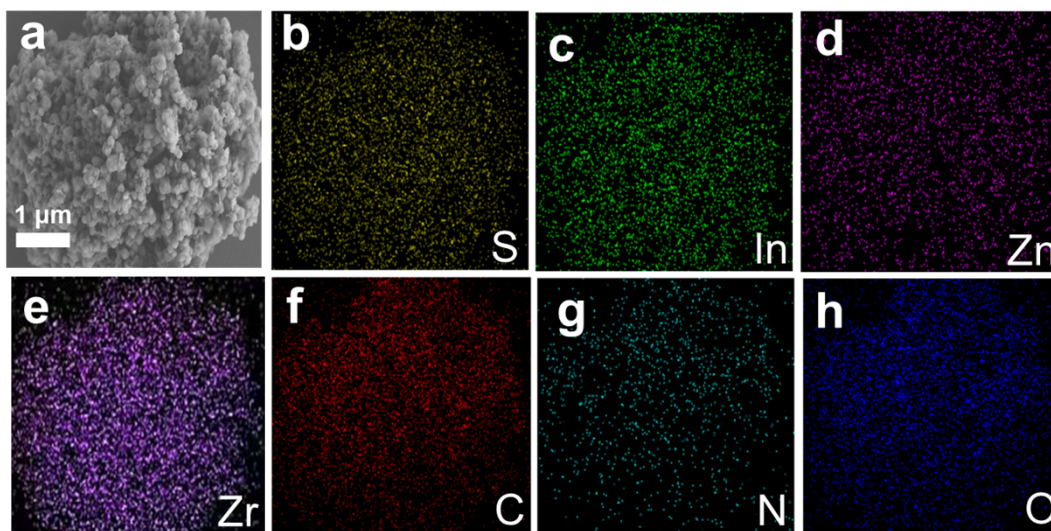

**Fig. S4** EDS mapping images of Z/UN.

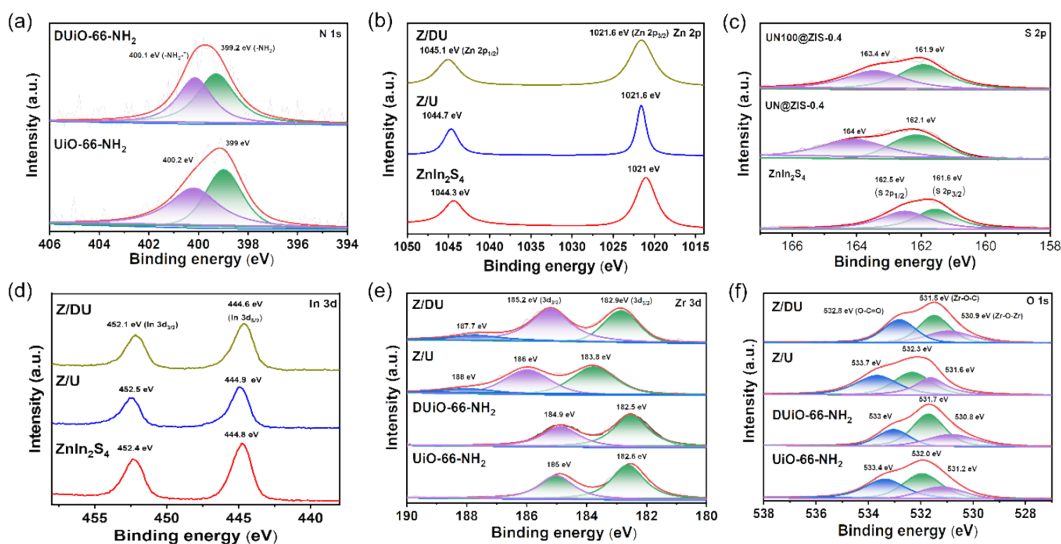

**Fig. S5** N 1s (a), Zn 2p (b), S 2p (c), In 3d (d), Zr 3d (e) and O 1s (f) XPS spectra of ZnIn<sub>2</sub>S<sub>4</sub>, UiO-66-NH<sub>2</sub>, DUiO-66-NH<sub>2</sub>, Z/U and Z/DU.

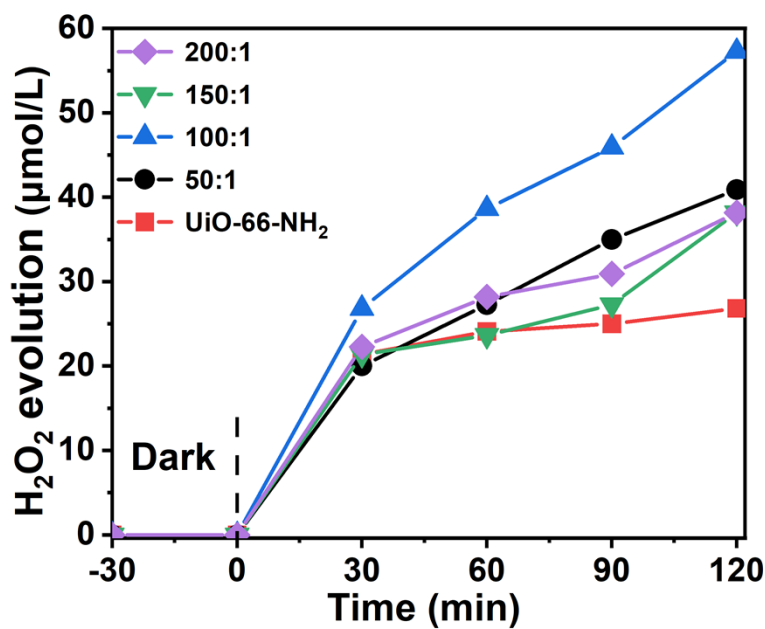

**Fig. S6** Photocatalytic H<sub>2</sub>O<sub>2</sub> production over UiO-66-NH<sub>2</sub> and DUiO-66-NH<sub>2</sub> with HCOOH/ATA molar ratios of 50:1, 100:1, 150:1 and 200:1.

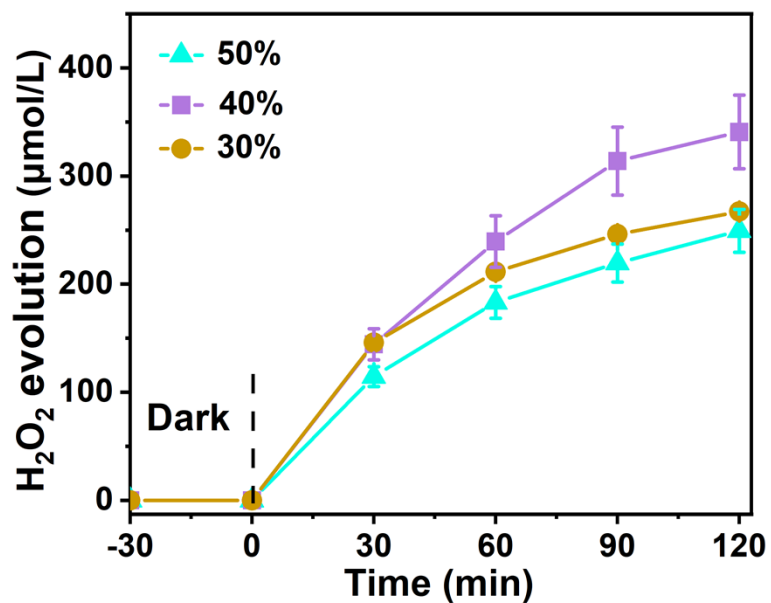

**Fig. S7** Photocatalytic H<sub>2</sub>O<sub>2</sub> production over Z/DU with 30%, 40% and 50% weight ratio of DUiO-66-NH<sub>2</sub>.

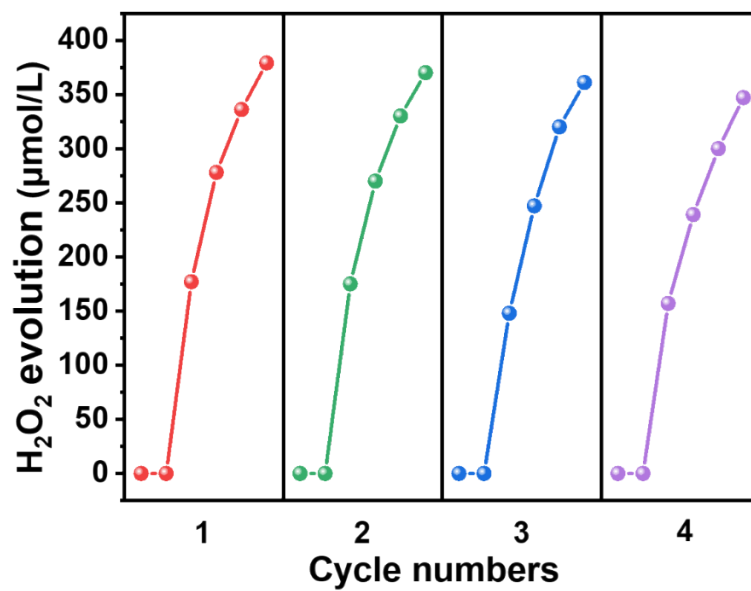

**Fig. S8** Cycle tests of Z/DU for photocatalytic H<sub>2</sub>O<sub>2</sub> production.

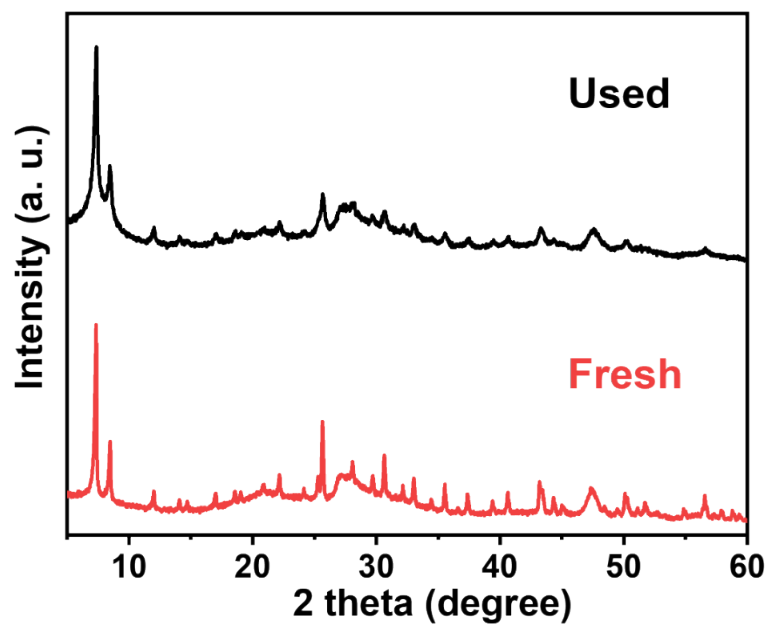

**Fig. S9** XRD patterns of Z-UN before and after cycling experiments.

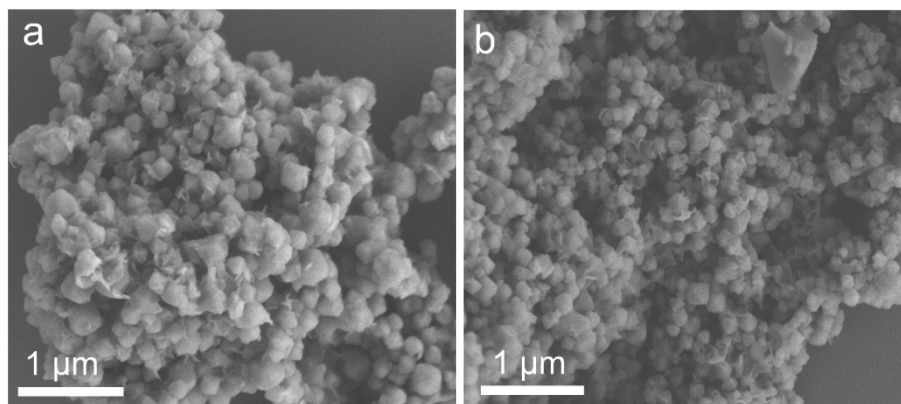

**Fig. S10** SEM images of Z/DU before (a) and after (b) photocatalytic reactions.

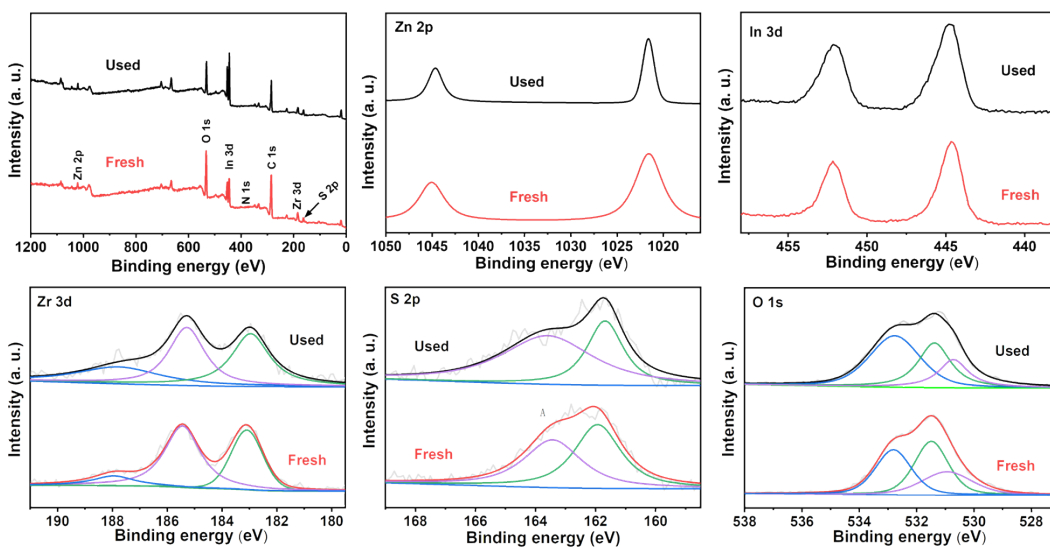

Fig. S11 XPS spectra of Z/DO before and after photocatalytic reactions.

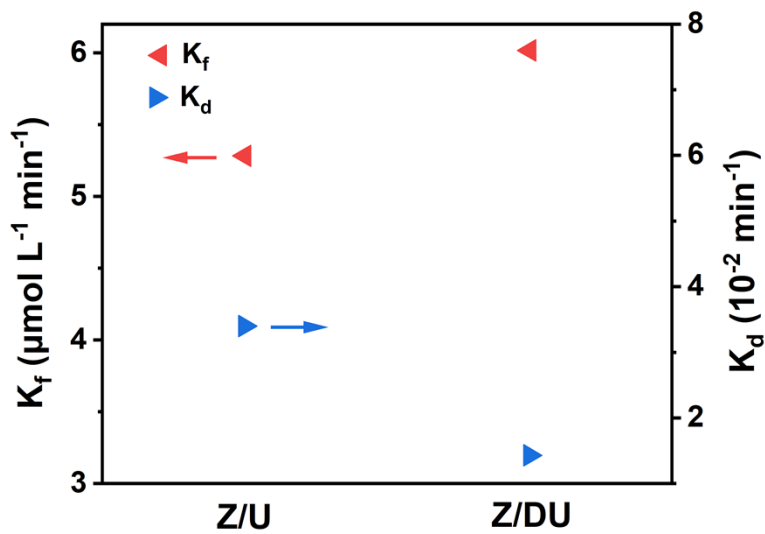

Fig. S12  $K_f$  and  $K_d$  of  $\text{H}_2\text{O}_2$  over Z/DO and Z/U.

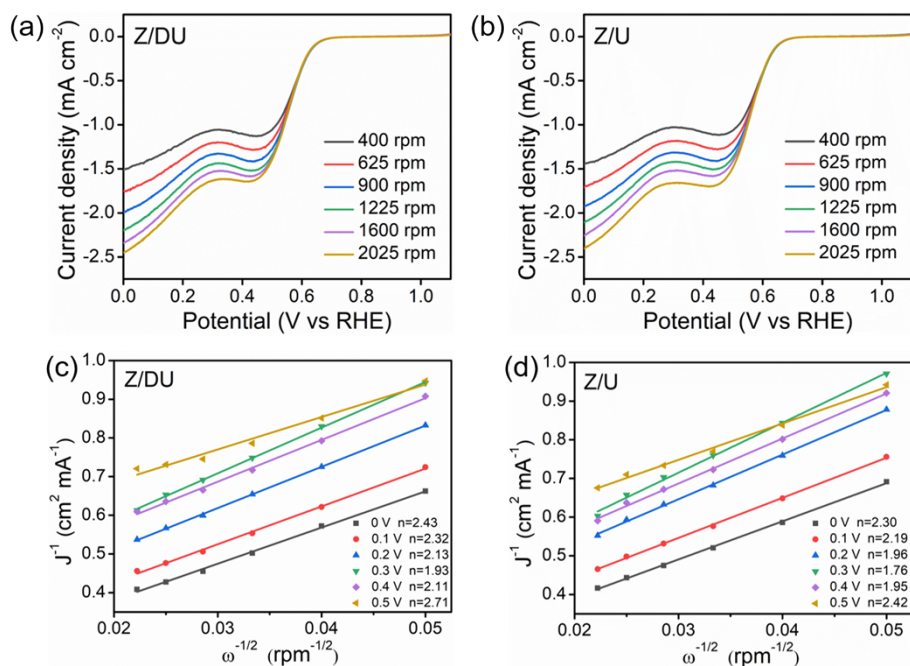

**Fig. S13** LSV curves of Z/DU (a) and Z/U (b) tested by rotating disk electrode, the corresponding fitted Koutecky-Levich plots and calculated electron transfer number of Z/DU (c) and Z/U (d) in different potentials.

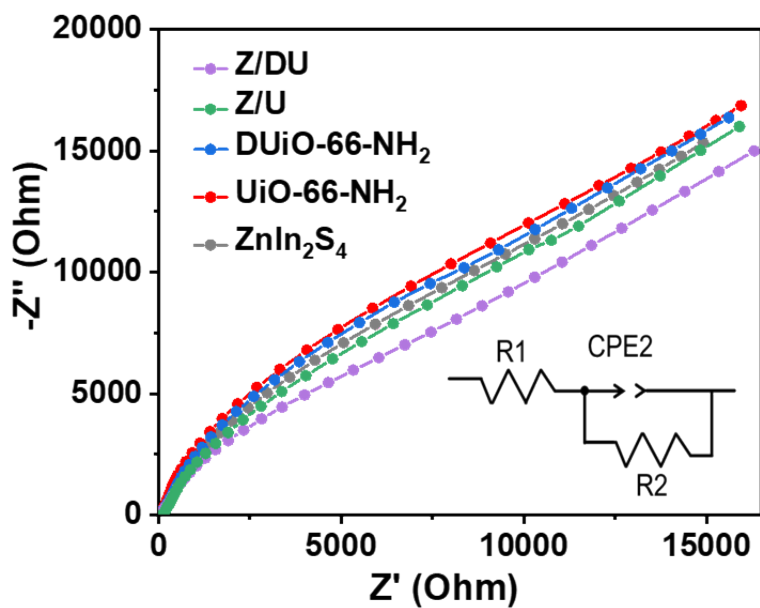

**Fig. S14** EIS Nyquist plots over  $\text{ZnIn}_2\text{S}_4$ ,  $\text{DUiO-66-NH}_2$ ,  $\text{UiO-66-NH}_2$ , Z/U and Z/DU.



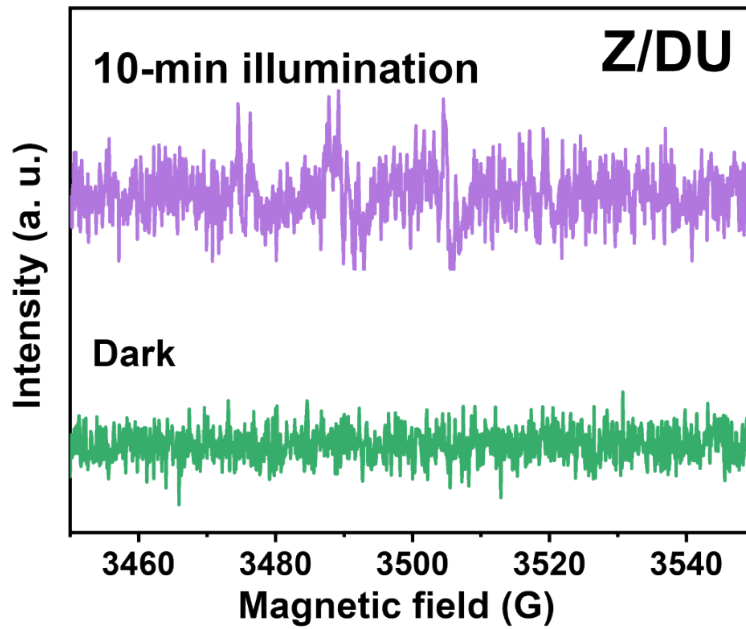

Fig. S15 EPR spectra of DMPO-·OH adducts over Z/DU at dark and 10-min illumination.

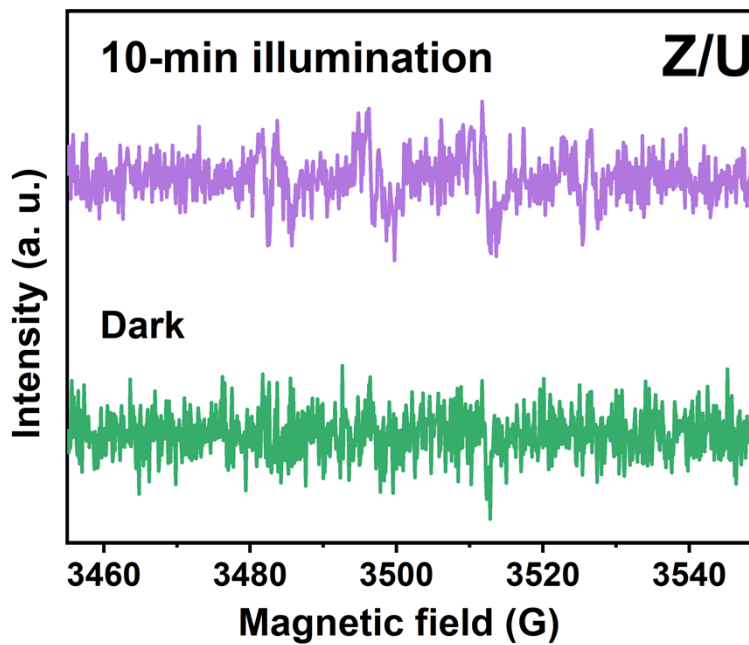

Fig. S16 EPR spectra of DMPO-·OH adducts over Z/U at dark and 10-min illumination.

**Table S1** Data comparison of photocatalytic H<sub>2</sub>O<sub>2</sub> production over MOF-based photocatalysts.

| Photocatalyst                                                                  | Light      | Sacrificial agent | Gas            | Production rate<br>( $\mu\text{mol}\cdot\text{g}^{-1}\cdot\text{h}^{-1}$ ) | Ref.                 |
|--------------------------------------------------------------------------------|------------|-------------------|----------------|----------------------------------------------------------------------------|----------------------|
| Ce-MIL-125-NH <sub>2</sub>                                                     | Vis        | No                | O <sub>2</sub> | 99                                                                         | S1                   |
| Alkylated MIL-125                                                              | Vis        | Benzyl alcohol    | Air            | 313                                                                        | S2                   |
| Ni/Hf-UiO-66-NH <sub>2</sub>                                                   | Vis        | No                | O <sub>2</sub> | 37                                                                         | S3                   |
| MIL-125-<br>NH <sub>2</sub> (TiO <sub>2</sub> )/Ti <sub>3</sub> C <sub>2</sub> | Vis        | Isopropanol       | O <sub>2</sub> | 278                                                                        | S4                   |
| MIL-125-PDI                                                                    | Vis        | No                | O <sub>2</sub> | 24                                                                         | S5                   |
| MIL-125-NH <sub>2</sub> @ZnS                                                   | Vis        | Benzyl alcohol    | O <sub>2</sub> | 600                                                                        | S6                   |
| C <sub>3</sub> N <sub>4</sub> /MIL-101(Fe)-<br>NH <sub>2</sub>                 | UV-vis     | No                | Air            | 12                                                                         | S7                   |
| MIL-88B-<br>NH <sub>2</sub> @ZnIn <sub>2</sub> S <sub>4</sub>                  | Vis        | No                | Air            | 209                                                                        | S8                   |
| <b>Z/DU</b>                                                                    | <b>Vis</b> | <b>No</b>         | <b>Air</b>     | <b>350</b>                                                                 | <b>this<br/>work</b> |

## References

- S1 B. Yan, S. Hu, C. Bu, Y. a. Peng, H. Han, X. Xu, Y. Liu, J. Yu and Y. Dai, *ChemNanoMat*, 2023, **9**, e20230079.
- S2 Y. Isaka, Y. Kawase, Y. Kuwahara, K. Mori and H. Yamashita, *Angew. Chem. Int. Edit.*, 2019, **58**, 5402-5406.
- S3 Y. Kondo, K. Honda, Y. Kuwahara, K. Mori, H. Kobayashi and H. Yamashita, *ACS Catal.*, 2022, **12**, 14825-14835.
- S4 Y. Wu, X. Li, Q. Yang, D. Wang, F. Yao, J. Cao, Z. Chen, X. Huang, Y. Yang and X. Li, *Chem. Eng. J.*, 2020, **390**, 124519.
- S5 X. Chen, Y. Kondo, S. Li, Y. Kuwahara, K. Mori, D. Zhang, C. Louis and H. Yamashita, *J. Mater. Chem. A*, 2021, **9**, 26371-26380.
- S6 C. Liu, T. Bao, L. Yuan, C. Zhang, J. Wang, J. Wan and C. Yu, *Adv. Funct. Mater.*, 2022, **32**, 2111404.
- S7 S. Su, Z. Xing, S. Zhang, M. Du, Y. Wang, Z. Li, P. Chen, Q. Zhu and W. Zhou, *Appl. Surf. Sci.*, 2021, **537**, 147890.
- S8 M. Liu, Z. Xing, H. Zhao, S. Song, Y. Wang, Z. Li and W. Zhou, *J. Hazard. Mater.*, 2022, **437**, 129436.
